# Supplementary material for: Polyrotaxane frameworks containing N,N′,N′′-(4,4′,4′′-nitrilotris(4,1-phenylene))triisonicotinamide: structural and luminescent properties
Source: Royal Society of Chemistry journal article supplement (doi:10.1039/c3ce40558c), 2013-01-01
Supplement: c3ce40558c.pdf [file c3ce40558c.pdf]

# **Polyrotaxane Frameworks Containing N,N',N''-(4,4',4''-Nitrilotris(4,1-phenylene))triisonicotinamide : Structural and Luminescent Properties**

Biing-Chiau Tzeng,\* An Cao, TamilSelvi Selvam, and Tsung-Yi Chang

Department of Chemistry and Biochemistry, National Chung Cheng University, 168 University Rd., Min-Hsiung, Chiayi 62102, Taiwan

## **Supporting Information**

**Figure S1.** The experimental and simulated powder X-ray diffraction patterns of **1**.

**Figure S2.** The experimental and simulated powder X-ray diffraction patterns of **2**.

**Figure S3.** The experimental and simulated powder X-ray diffraction patterns of **3**.

**Figure S4.** The experimental and simulated powder X-ray diffraction patterns of **4**.

**Figure S5.** The TGA trace of **1**.

**Figure S6.** The TGA trace of **2**.

**Figure S7.** The TGA trace of **3**.

**Figure S8.** The TGA trace of **4**.

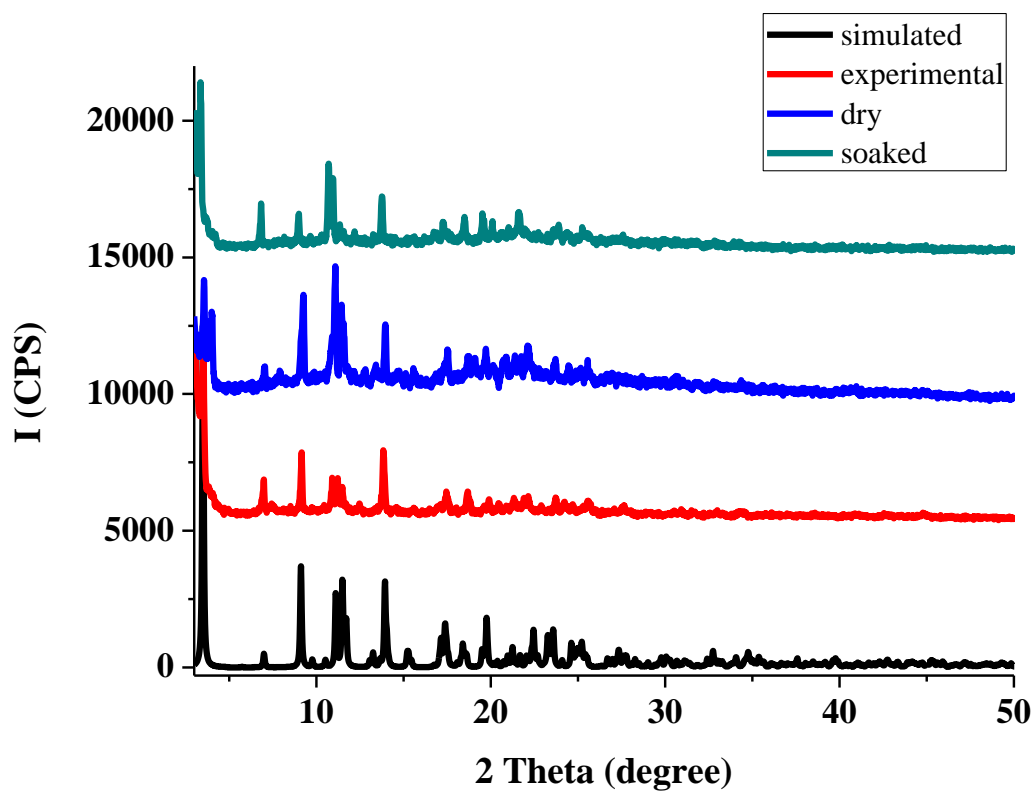

Figure S1

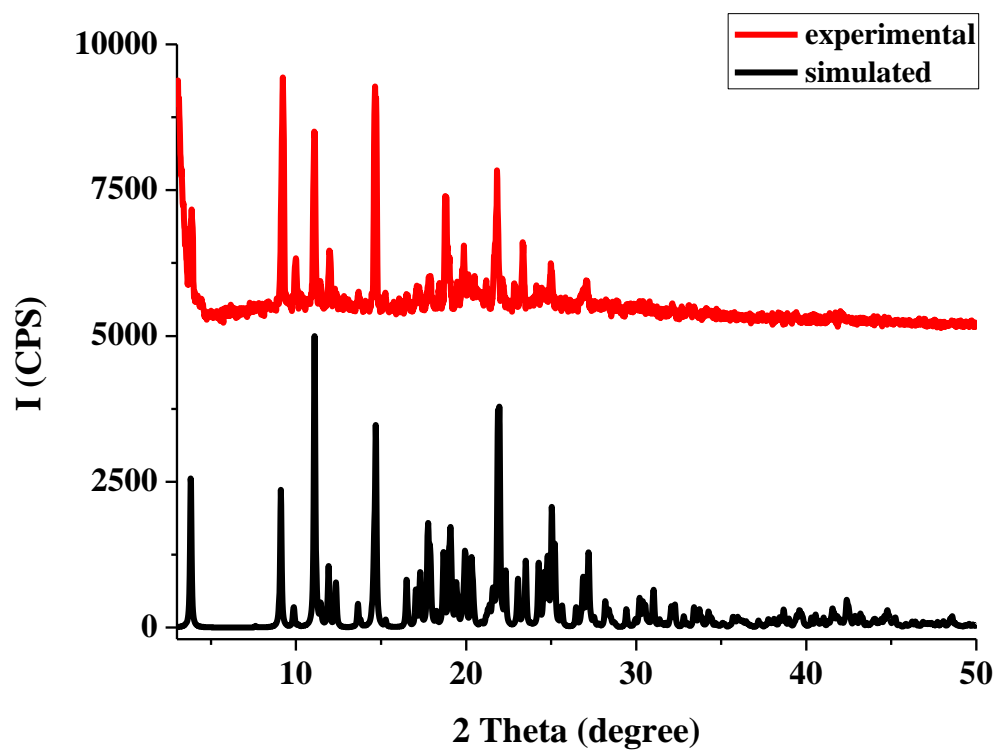

Figure S2

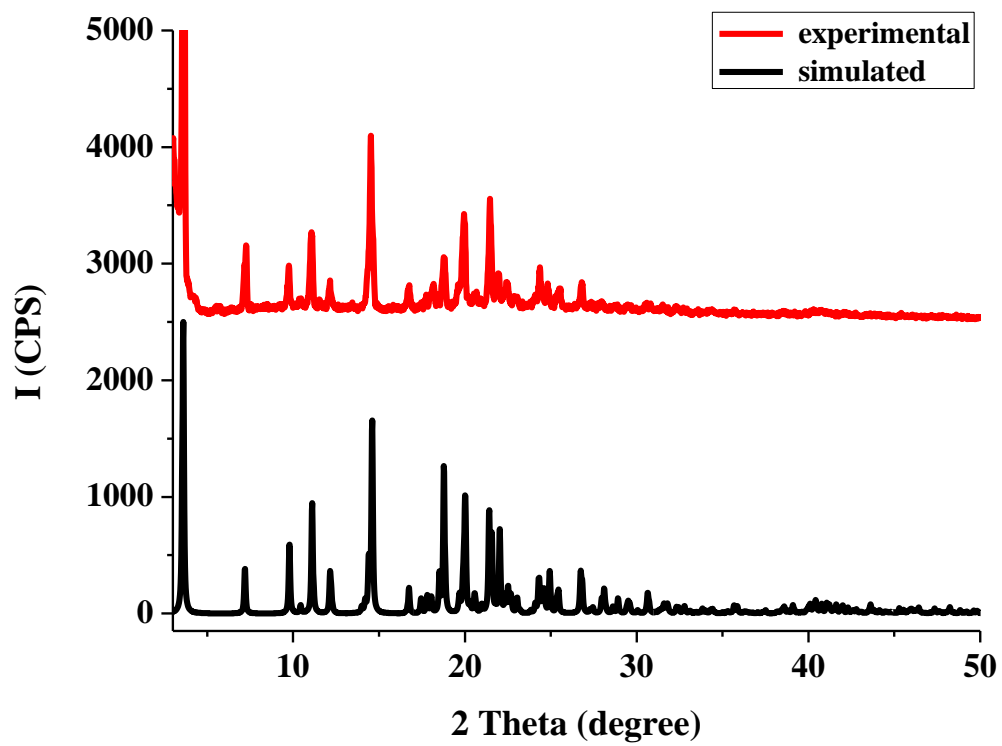

Figure S3

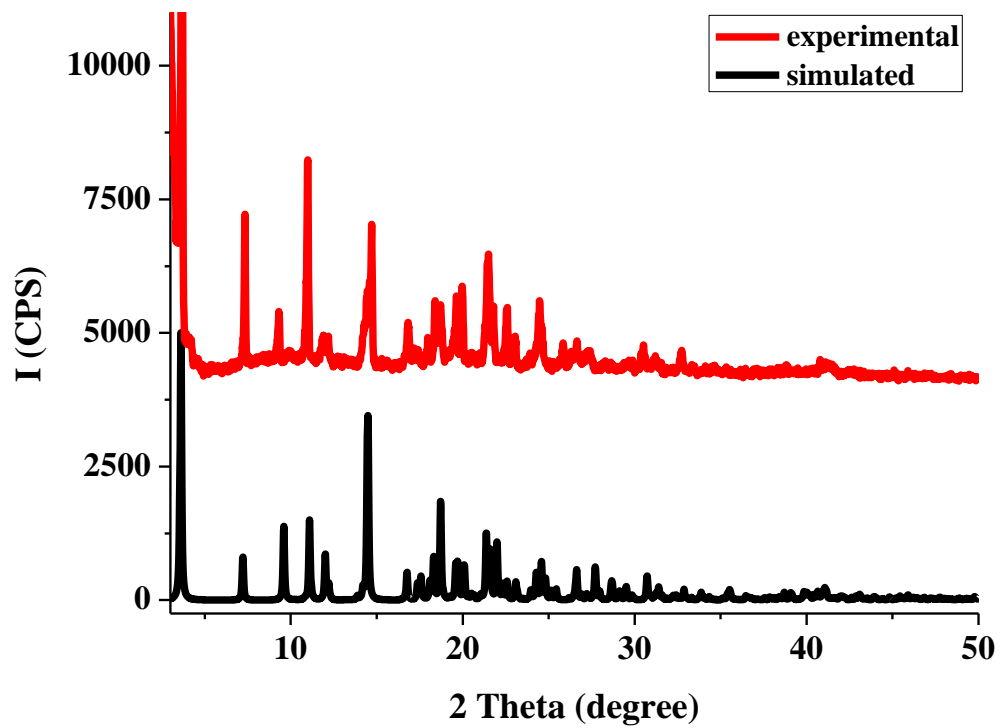

Figure S4

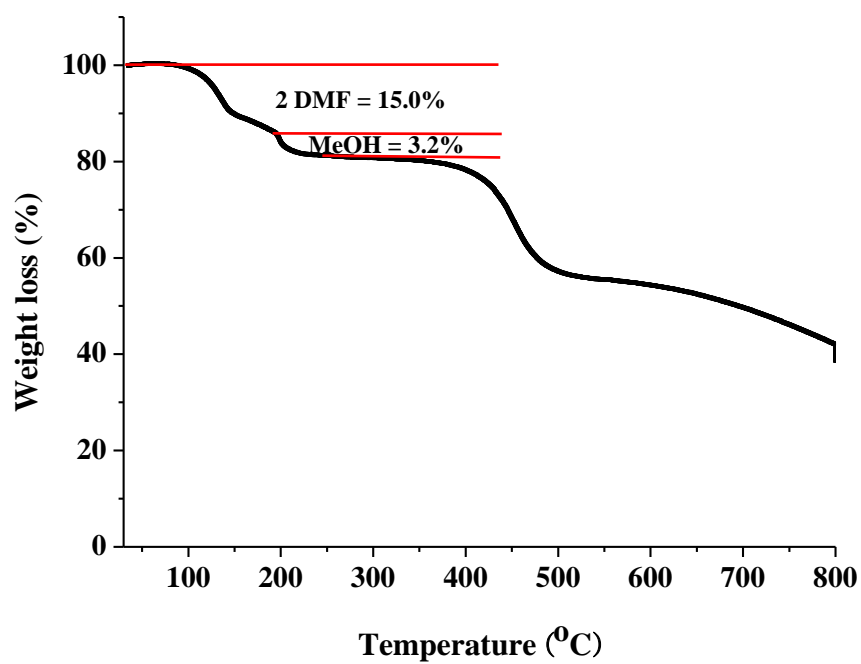

Figure S5

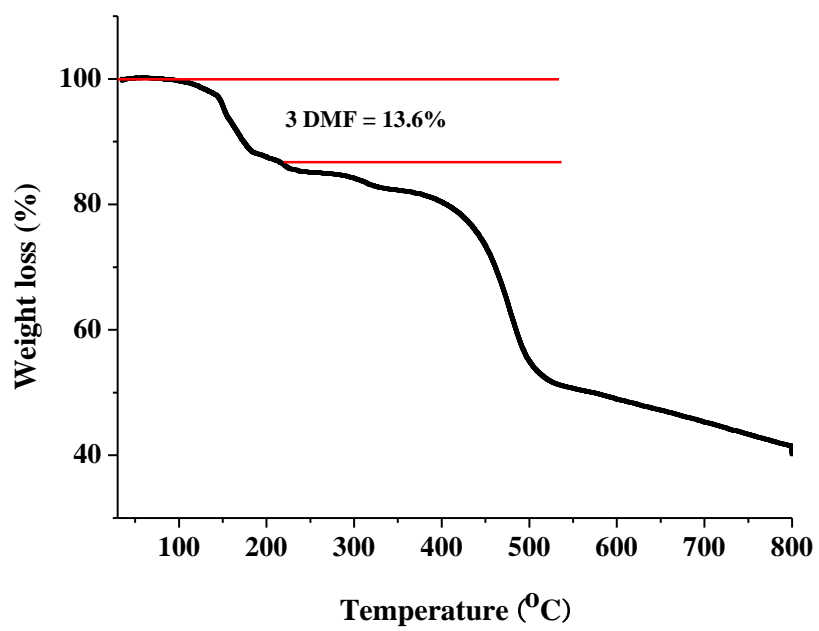

Figure S6

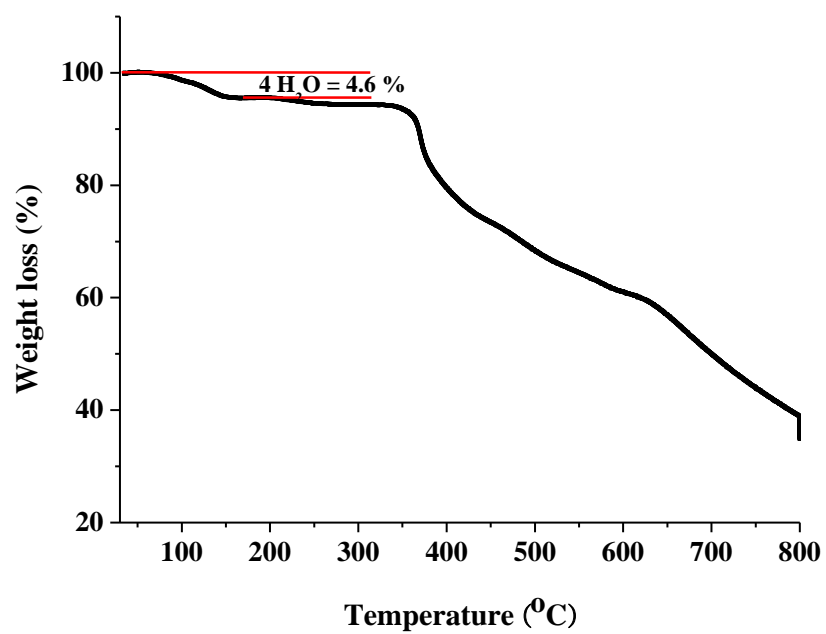

Figure S7



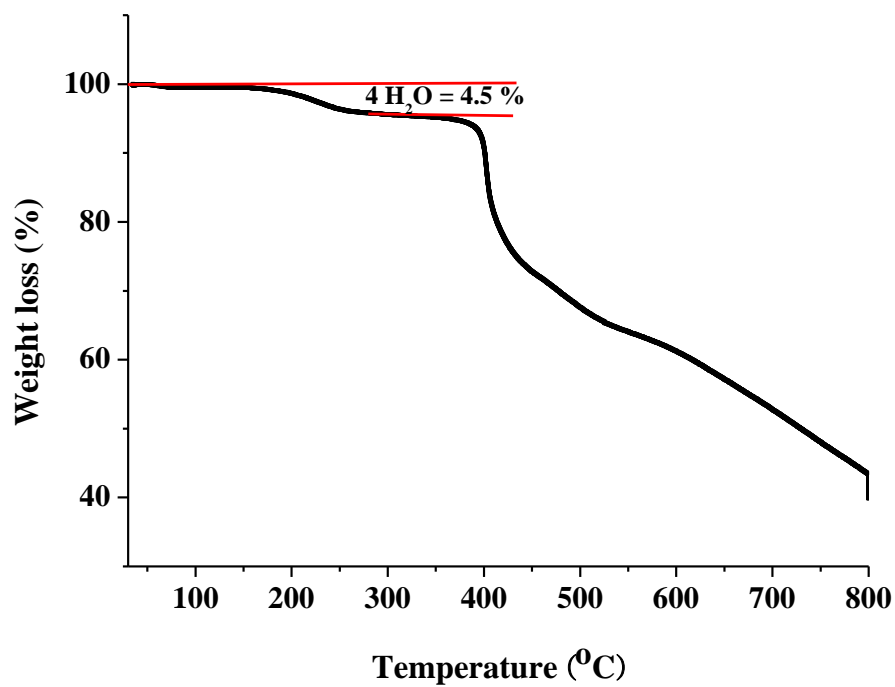

Figure S8
